# Supplementary material for: Fabrication of a stable Au/Ta2O5 plasmonic photoanode for water splitting under visible light irradiation
Source: Royal Society of Chemistry journal article supplement (doi:10.1039/d2se01677j), 2023-01-01
Supplement: d2se01677j1.pdf [file d2se01677j1.pdf]

Supporting information

# **Fabrication of a stable Au/Ta<sub>2</sub>O<sub>5</sub> plasmonic photoanode for water splitting working under visible light irradiation**

*Eri Fudo<sup>a</sup>, Hiroyuki Asakura<sup>b</sup>, Atsuhiro Tanaka<sup>b</sup>, Hiroshi Kominami<sup>b\*</sup>*

<sup>a</sup> Department of Molecular and Material Engineering, Graduate School of Science and Engineering, Kindai University, Kowakae, Higashiosaka, Osaka 577-8502, Japan

<sup>b</sup> Department of Applied Chemistry, Faculty of Science and Engineering, Kindai University, Kowakae, Higashiosaka, Osaka 577-8502, Japan

## **Table of Contents**

Experimental (Impedance measurement)

Supplementary Figures

**Figure S1.** Mott–Schottky plots based on impedance measurements. Plot for (a) Ta<sub>2</sub>O<sub>5</sub>/FTO and (b) Au/Ta<sub>2</sub>O<sub>5</sub>/FTO at frequency of 35 kHz.

**Figure S2.** The effect of the amount of Au modified on Ta<sub>2</sub>O<sub>5</sub> on the amount of photocurrent at 0.8 V vs. RHE under irradiation of visible light from a Xe lamp equipped with an L42 cut-filter. All Au/Ta<sub>2</sub>O<sub>5</sub>/FTO electrodes were prepared under the same conditions (described in experimental section).

**Figure S3.** Time courses of the amounts of H<sub>2</sub> and O<sub>2</sub> from water over Au/Ta<sub>2</sub>O<sub>5</sub>/FTO at 0.8, 1.0, and 1.2 V vs. RHE under light irradiation.

**Figure S4.** (a) Au L<sub>III</sub>-edge XANES spectra of Au/Ta<sub>2</sub>O<sub>5</sub>/FTO before and after the photoelectrochemical measurements and (b) XPS spectra around the Au 4f component.

**Figure S5.** Photoabsorption spectrum and IPCE action spectrum of the Au/Ta<sub>2</sub>O<sub>5</sub>/FTO photoelectrode.

**Table S1** Summary of several reported results for water splitting and water oxidation using photoanodes.

## Supporting information

### Experimental (Impedance measurement)

Impedance measurements were done in a three-electrode electrochemical cell using Ta<sub>2</sub>O<sub>5</sub>/FTO or Au/Ta<sub>2</sub>O<sub>5</sub>/FTO, Ag/AgCl, and Pt wire as the working electrode, reference electrode, and counter electrode, respectively. An aqueous Na<sub>2</sub>SO<sub>4</sub> solution (0.1 M, pH 6) was used as an electrolyte. Before the measurements, the dissolved air was removed by purging with Ar gas for 30 min. The imaginary component of the impedance ( $Z''$ ) of the equivalent circuit including the Ta<sub>2</sub>O<sub>5</sub>/FTO or Au/Ta<sub>2</sub>O<sub>5</sub>/FTO electrodes were evaluated at three current frequencies of 35 kHz with sweeping applied voltage from -0.85 to 0.75 V vs. Ag/AgCl using an electrochemical measurement system (HZ-7000, Hokuto Denko, Hyogo).

Flatband potential values from impedance measurements were obtained from the extrapolation of Mott-Schottky plots ( $C^{-2}$  vs. applied potential) using the following equation (S1):

$$\frac{1}{C^2} = \frac{2}{\varepsilon \varepsilon_0 A e N_D} \left( E - E_{FB} - \frac{k_B T}{e} \right) \quad (S1)$$

where  $C$  is the space capacitance (calculated from equation (S2)),  $\varepsilon$  is the dielectric constant of the semiconductor,  $\varepsilon_0$  is the permittivity of free space,  $A$  is the interfacial area,  $N_D$  is the number of donors,  $E$  is the externally applied potential,  $E_{FB}$  is the flatband potential at the semiconductor/electrolyte junction,  $k_B$  is Boltzmann's constant,  $T$  is the absolute temperature, and  $e$  is the electronic charge,

$$|Z''| = \frac{1}{2\pi f C} \quad (S2)$$

The difference in the potential ( $E$ ) derived from the pH value of the electrolyte solution was revised in accordance with the Nernst equation (S3):

$$E(\text{pH} = a) = E(\text{pH} = b) - 0.059 \times (a - b) \quad (S3)$$

The potential (vs. Ag/AgCl) was converted to the potential (vs. NHE) by the following equation (S4):

$$E(\text{vs. NHE}) - E(\text{vs. Ag/AgCl}) = 0.199 \text{ V} \quad (S4)$$

**Supplementary Figures**

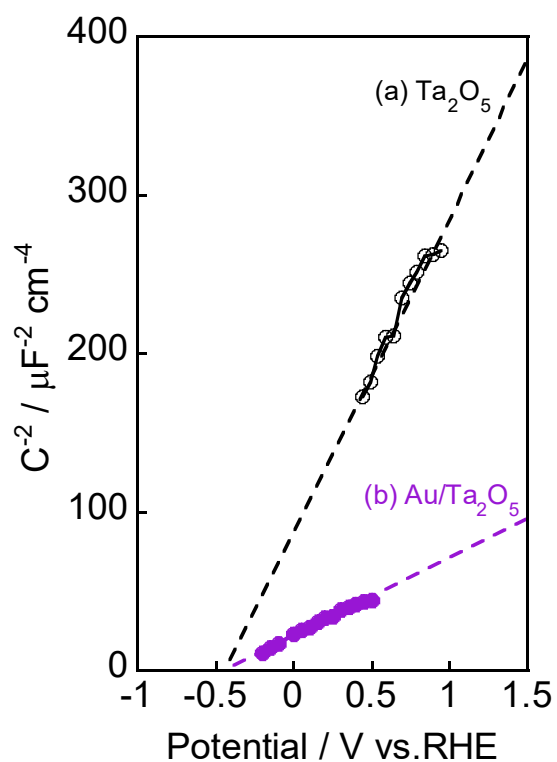

**Figure S1.** Mott–Schottky plots based on impedance measurements. Plot for (a)  $\text{Ta}_2\text{O}_5/\text{FTO}$  and (b)  $\text{Au/Ta}_2\text{O}_5/\text{FTO}$  at frequency of 35 kHz.

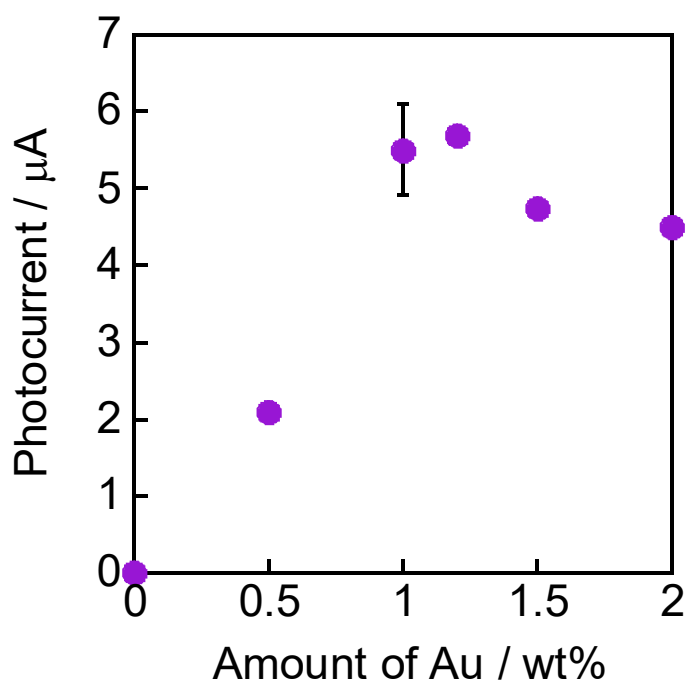

**Figure S2.** The effect of the amount of Au modified on Ta<sub>2</sub>O<sub>5</sub> on the amount of photocurrent at 0.8 V vs. RHE under irradiation of visible light from a Xe lamp equipped with an L42 cut-filter. All Au/Ta<sub>2</sub>O<sub>5</sub>/FTO electrodes were prepared under the same conditions (described in experimental section).

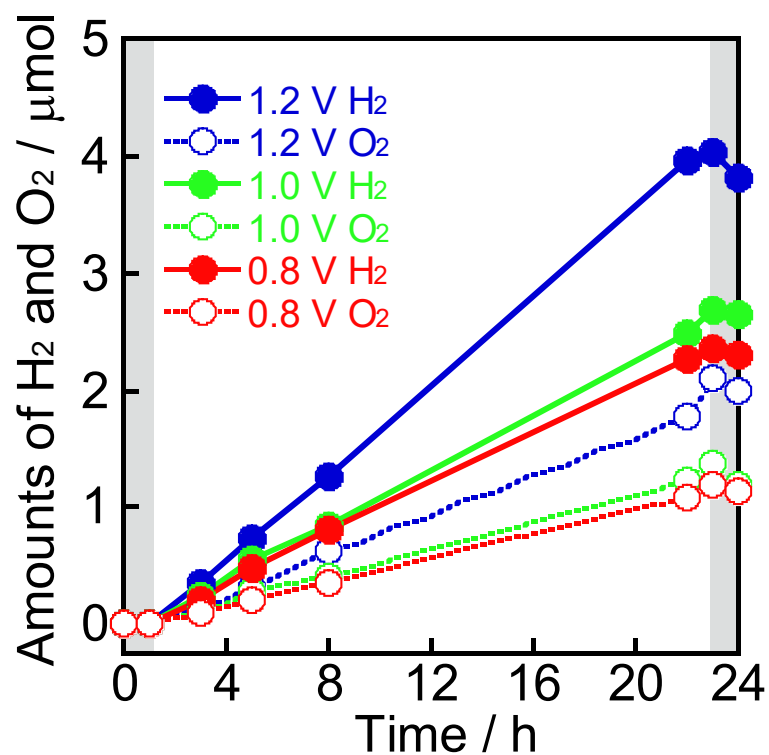

**Figure S3.** Time courses of the amounts of H<sub>2</sub> and O<sub>2</sub> from water over Au/Ta<sub>2</sub>O<sub>5</sub>/FTO at 0.8, 1.0, and 1.2 V vs. RHE under light irradiation. Visible light from a Xe lamp equipped with an L42 cut filter was irradiated to the electrodes.

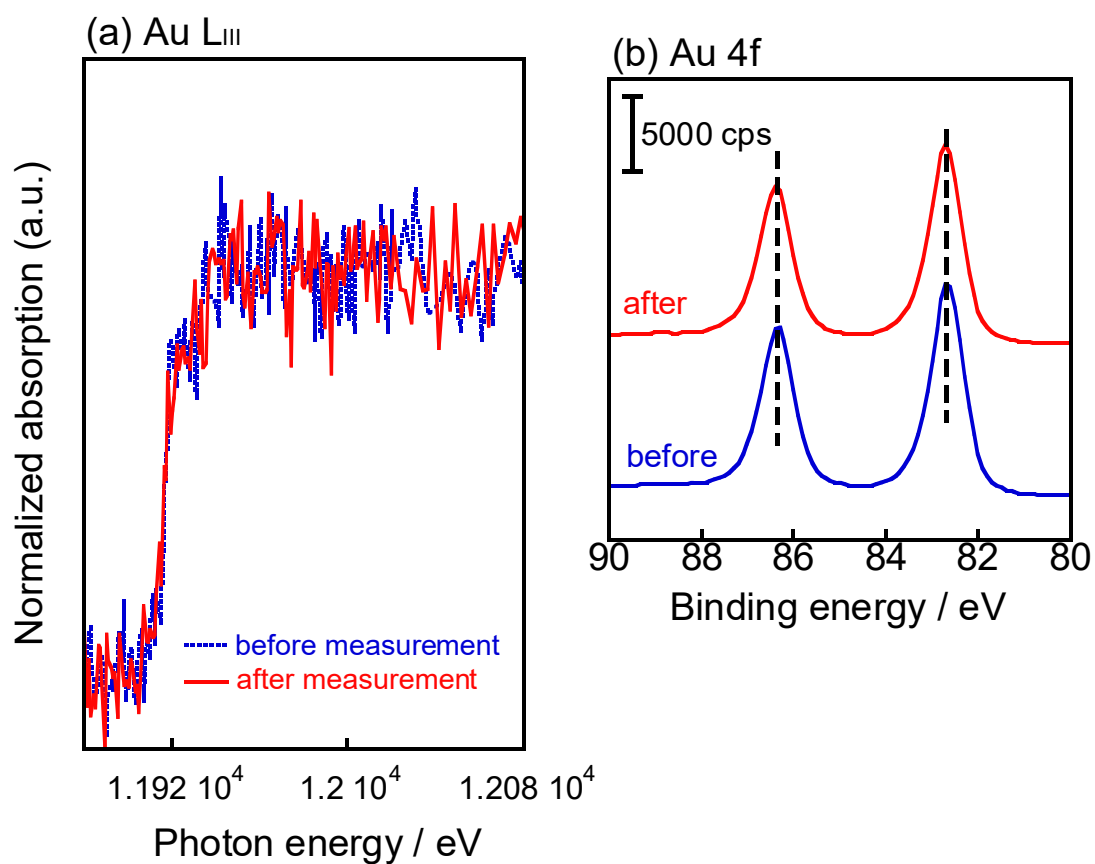

**Figure S4.** (a) Au L<sub>III</sub>-edge XANES spectra of Au/Ta<sub>2</sub>O<sub>5</sub>/FTO before and after the photoelectrochemical measurements and (b) XPS spectra around the Au 4f component.

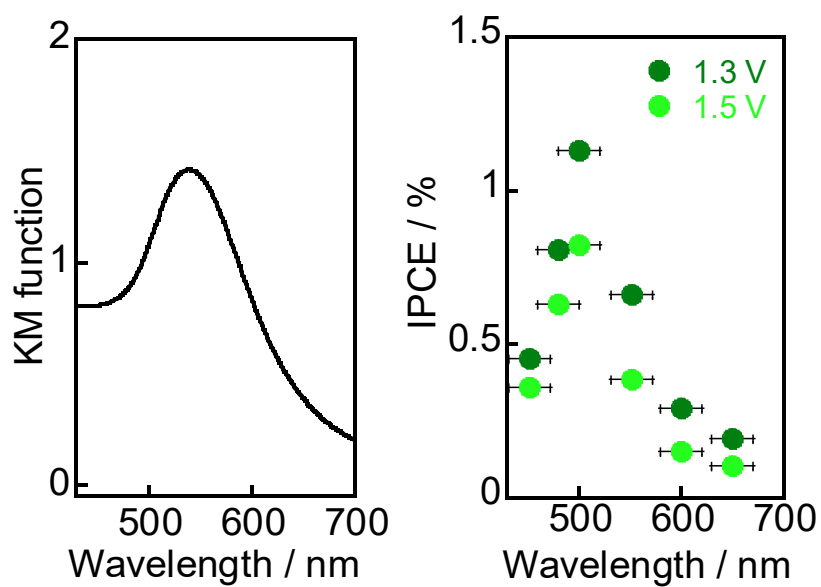

**Figure S5.** Photoabsorption spectrum and IPCE action spectrum of the Au/Ta<sub>2</sub>O<sub>5</sub>/FTO photoelectrode. The IPCE measurement was conducted at +1.3 V and + 1.5 V vs. RHE.

## Supporting information

**Table S1** Summary of several reported results for water splitting and water oxidation using photoanodes.

| Entry      | electrode                                   | type          | reaction                  | light                                | activity                                                                                                  | Faraday efficiency | IPCE                                     | DOI                             |
|------------|---------------------------------------------|---------------|---------------------------|--------------------------------------|-----------------------------------------------------------------------------------------------------------|--------------------|------------------------------------------|---------------------------------|
| This study | Au/Ta <sub>2</sub> O <sub>5</sub>           | sensitization | water splitting           | Xe lamp (L42)                        | H <sub>2</sub> : 101 nmol h <sup>-1</sup> ; O <sub>2</sub> : 52 nmol h <sup>-1</sup><br>0.8 V vs. RHE     | 65 %               | 0.6 %<br>(0.7 V vs. RHE, 420 nm)         | -                               |
| 1          | Ni(OH) <sub>2</sub> /Au NP/TiO <sub>2</sub> | sensitization | water splitting           | Xe lamp<br>(460 nm long-pass filter) | H <sub>2</sub> : 190 nmol h <sup>-1</sup> ; O <sub>2</sub> : 75 nmol h <sup>-1</sup><br>0.2 V vs. Ag/AgCl | n/a                | ca. 0.1 %<br>(0.2 V vs. Ag/AgCl, 600 nm) | 10.1002/cnma.201900187          |
| 2          | CoO <sub>x</sub> /Au/TiO <sub>2</sub>       | sensitization | water oxidation           | solar simulator                      | O <sub>2</sub> : 2 μmol h <sup>-1</sup><br>0.66 V vs. RHE                                                 | n/a                | 0.8 %<br>(0.9 V vs. RHE, 600 nm)         | 10.1021/acsaem.0c00857          |
| 3          | Co/TiO <sub>2</sub>                         | sensitization | water oxidation           | Xe lamp (Y44)                        | O <sub>2</sub> : 70 nmol h <sup>-1</sup><br>0.56 V vs. RHE                                                | 12 %               | 0.9 %<br>(0.56 V vs. RHE, 500 nm)        | 10.1021/acsami.9b20793          |
| 4          | Ru dye(RuP1)/TiO <sub>2</sub>               | sensitization | water oxidation           | Xe lamp<br>(400 nm long-pass filter) | O <sub>2</sub> : 142 nmol h <sup>-1</sup><br>0 V vs. Pt                                                   | 74 %               | 1.85 %<br>(0 V vs. Pt, 455 nm)           | 10.1016/j.electacta.2014.10.111 |
| 5          | TiO <sub>2</sub> -coated Au nanodots        | sensitization | water splitting           | Dolan Jenner fiber-optic light       | H <sub>2</sub> : 7 μmol h <sup>-1</sup> ; O <sub>2</sub> : 4 μmol h <sup>-1</sup><br>0.897 V vs. SHE      | 94.9 %             | n/a                                      | 10.1021/nn504484u               |
| 6          | CoO <sub>x</sub> /TaON                      | bandgap       | water splitting           | Xe lamp (L42)                        | H <sub>2</sub> : 134 μmol h <sup>-1</sup> ; O <sub>2</sub> : 67 μmol h <sup>-1</sup><br>1.07 V vs. RHE    | n/a                | 42 %<br>(1.2 V vs. RHE, 400 nm)          | 10.1021/ja302059g               |
| 7          | Ti/WO <sub>3</sub> /Mo-BiV                  | bandgap       | water splitting           | Blu LED (454 nm)                     | H <sub>2</sub> : 60 μmol h <sup>-1</sup> ; O <sub>2</sub> : 30 μmol h <sup>-1</sup><br>1.2 V vs. RHE      | 94 %               | 10.7 %<br>(1.2 V vs. RHE, 454 nm)        | 10.1021/acssuschemeng.0c02331   |
| 8          | IrO <sub>2</sub> -TaON                      | bandgap       | water splitting           | Xe lamp (L42)                        | H <sub>2</sub> : 26 μmol h <sup>-1</sup> ; O <sub>2</sub> : 12 μmol h <sup>-1</sup><br>1.0 V vs. Pt       | n/a                | 76 %<br>(0.6 V vs. Ag/AgCl, 400 nm)      | 10.1021/ja1016552               |
| 9          | w-α-Fe <sub>2</sub> O <sub>3</sub>          | bandgap       | water oxidation           | Xe lamp (L42)                        | O <sub>2</sub> : 3 μmol h <sup>-1</sup><br>1.23 V vs. RHE                                                 | ca. 100 %          | 13 %<br>(1.23 V vs. RHE, 420 nm)         | 10.1021/acsami.1c08949          |
| 10         | CdS                                         | bandgap       | CO <sub>2</sub> reduction | Xe lamp (L42)                        | CO: 20 μmol h <sup>-1</sup><br>0.5 V vs. Ag                                                               | n/a                | n/a                                      | 10.1039/d1nj06073b              |
| 11         | WO <sub>3</sub>                             | bandgap       | HClO production           | AM 1.5G                              | HClO: 1.76 μmol h <sup>-1</sup>                                                                           | 96 %               | 0.9%<br>(-, 420 nm)                      | 10.1021/acssuschemeng.0c01341   |
